RESEARCH ARTICLE

# Machine learning for predicting cognitive decline within five years in Parkinson's disease: Comparing cognitive assessment scales with DAT SPECT and clinical biomarkers

Arman Gorji<sup>1,2</sup> , Ali Fathi Jouzdani<sup>1,2</sup> \*

**1** Department of Neuroscience, School of Science and Advanced Technologies in Medicine, Neuroscience and Artificial Intelligence Research Group (NAIRG), Hamadan University of Medical Sciences, Hamadan, Iran, **2** USERN Office, Hamadan University of Medical Sciences, Hamadan, Iran

 These authors contributed equally to this work.

\* [Ali.fathi77@gmail.com](mailto:Ali.fathi77@gmail.com), [a.fathi@edu.umsha.ac.ir](mailto:a.fathi@edu.umsha.ac.ir)

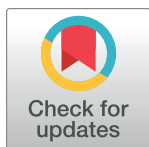

## Abstract

### OPEN ACCESS

**Citation:** Gorji A, Fathi Jouzdani A (2024) Machine learning for predicting cognitive decline within five years in Parkinson's disease: Comparing cognitive assessment scales with DAT SPECT and clinical biomarkers. PLoS ONE 19(7): e0304355. <https://doi.org/10.1371/journal.pone.0304355>

**Editor:** Stephen D. Ginsberg, Nathan S Kline Institute, UNITED STATES

**Received:** October 12, 2023

**Accepted:** May 8, 2024

**Published:** July 17, 2024

**Peer Review History:** PLOS recognizes the benefits of transparency in the peer review process; therefore, we enable the publication of all of the content of peer review and author responses alongside final, published articles. The editorial history of this article is available here: <https://doi.org/10.1371/journal.pone.0304355>

**Copyright:** © 2024 Gorji, Jouzdani. This is an open access article distributed under the terms of the [Creative Commons Attribution License](https://creativecommons.org/licenses/by/4.0/), which permits unrestricted use, distribution, and reproduction in any medium, provided the original author and source are credited.

**Data Availability Statement:** The Python script used for this research is accessible at the following URL: <https://github.com/gorjiarman/PD-MCI-Prediction>. The data included in the notebook were

## Objective

Parkinson's disease (PD) is an age-related neurodegenerative condition characterized mostly by motor symptoms. Although a wide range of non-motor symptoms (NMS) are frequently experienced by PD patients. One of the important and common NMS is cognitive impairment, which is measured using different cognitive scales. Monitoring cognitive impairment and its decline in PD is essential for patient care and management. In this study, our goal is to identify the most effective cognitive scale in predicting cognitive decline over a 5-year timeframe initializing clinical biomarkers and DAT SPECT.

## Methods

Machine Learning has previously shown superior performance in image and clinical data classification and detection. In this study, we propose to use machine learning with different types of data, such as DAT SPECT and clinical biomarkers, to predict PD-CD based on various cognitive scales. We collected 330 DAT SPECT images and their clinical data in baseline, years 2,3,4, and 5 from Parkinson's Progression Markers Initiative (PPMI). We then designed a 3D Autoencoder to extract deep radiomic features (DF) from DAT SPECT images, and we then concatenated it with 17 clinical features (CF) to predict cognitive decline based on Montreal Cognitive Assessment (MoCA) and The Movement Disorder Society-Unified Parkinson's Disease Rating Scale (MDS-UPDRS-I).

## Results

The utilization of MoCA as a cognitive decline scale yielded better performance in various years compared to MDS-UPDRS-I. In year 4, the application of the deep radiomic feature resulted in the highest achievement, with a cross-validation AUC of 89.28, utilizing the gradient boosting classifier. For the MDS-UPDRS-I scale, the highest achievement was obtained

procured directly from the Parkinson's Progression Markers Initiative (PPMI) and are subject to a Data Usage Agreement that prohibits public sharing or republishing. This dataset was collected by PPMI from 2010 through 2023. Our team, by Ali Fathi Jouzdani, accessed it in February 2021 and downloaded data up until February 2023 for this study. PPMI's dataset comprises anonymized imaging, clinical, and demographic information, ensuring that no personal identifiers, such as names or addresses, are disclosed. In compliance with the Data Usage Agreement, we are restricted from redistributing the data or publicly disclosing any patient identifiers. Access to the dataset is granted upon user registration at the PPMI website: <https://www.ppmi-info.org/access-data-specimens/download-data>. PPMI is listed in the National Institutes of Health's clinical trial registry under the identifier NCT04477785."

**Funding:** This work was funded by the Michael J. Fox Foundation for Parkinson's Research (MJFF-021134; <https://www.michaeljfox.org>). The funders had no role in study design, data collection and analysis, decision to publish, or preparation of the manuscript.

**Competing interests:** The authors have declared that no competing interests exist.

by utilizing the deep radiomic feature, resulting in a cross-validation AUC of 81.34 with the random forest classifier.

## Conclusions

The study findings indicate that the MoCA scale may be a more effective predictor of cognitive decline within 5 years compared to MDS-UPDRS-I. Furthermore, deep radiomic features had better performance compared to sole clinical biomarkers or clinical and deep radiomic combined. These results suggest that using the MoCA score and deep radiomic features extracted from DAT SPECT could be a promising approach for identifying individuals at risk for cognitive decline in four years. Future research is needed to validate these findings and explore their utility in clinical practice.

## Introduction

Parkinson's disease (PD) is a neurodegenerative disorder that affects the basal ganglia, an area of the brain that regulates movement [1]. However, PD also has a variety of non-motor symptoms (NMS) that are related to a mix of dopaminergic and non-dopaminergic pathways, showing PD's multi-focal and widespread pathology [2]. Cognitive problems are one of the most common and important NMS that can happen at any stage of the disease [3]. Cognitive impairment in PD can range from mild cognitive impairment to dementia, impacting various cognitive domains. The cognitive abilities of PD patients often decline throughout the disease, and it is increasingly recognized as a significant aspect of PD progression [4]. In the past few years, many studies have focused on predicting cognitive decline in PD (PD-CD) [5–10]. The prediction of PD-CD involves a multifaceted approach incorporating various markers, assessments, and biomarkers over different time frames [11–13]. These predictive models provide valuable insights for patient management, clinical trial design, and the development of treatments for PD-CD.

Different scales are utilized for the prediction of PD-CD, and various studies have delved into the predictive capabilities of these scales [14–16]. Montreal Cognitive Assessment (MoCA) [17] is one of the best-known cognitive scales widely used to measure cognitive aspects of PD [5,8,9]. MoCA was initially created to assess mild cognitive impairment linked to Alzheimer's Disease, focusing on areas such as memory, executive functions, and verbal fluency. Another scale is UPDRS which is a widely accepted tool for measuring the severity of PD and tracking changes in motor and non-motor function over time [18]. The Movement Disorder Society-sponsored revision of the UPDRS (MDS-UPDRS) is a clinical assessment tool introduced in 2008 as an updated version of the original UPDRS. The MDS-UPDRS is comprised of four sections, with Part I dedicated to assessing non-motor aspects of daily living such as assessment of cognitive impairment, hallucinations and psychosis, depressed mood, anxious mood, and apathy [19].

The presence of visual hallucinations and psychosis has been associated with an increased risk of cognitive decline and dementia in PD [20]. Also, mood disturbances are prevalent non-motor symptoms in PD and can significantly impact cognitive function [21]. Based on these results, we chose to utilize the overall score of MDS-UPDRS-I rather than solely focusing on the cognitive impairment question. (Further details on the MoCA and MDS-UPDRS-I, as well as their respective questionnaires, can be found in [S1 Table](#)).

Predicting PD-CD is feasible across various periods, as evidenced by prior research employing different durations [5–10]. For instance, one study demonstrated that PD-CD could be forecasted within 2 years by integrating factors such as age, non-motor evaluations, DAT imaging, and CSF biomarkers [22]. Another investigation revealed that close to half of the PD patients who initially presented with normal cognitive function developed PD-CD within 6 years [12]. Furthermore, another study has indicated that baseline pro-saccadic metrics are predictive of PD-CD over 4.5 years [23].

In addition, researchers are investigating the use of various biomarkers to anticipate the development of PD-CD. The link between cognitive problems and age and Postural Instability and Gait Disorders (PIGD) was previously discussed in another study [24,25]. Another study also found that age is a predictor of MDS-UPDRS-I [26]. Minor hallucinations in people with PD might be a predictor of faster PD-CD [27]. Prior research has established a link between olfactory impairment and cognitive impairment [28–31]. According to several studies, the gene variant apolipoprotein E (APOE) is associated with PD-CD [32,33]. Cerebrospinal Fluid (CSF) biomarkers can also be useful in the prediction of PD-CD, one study [34] demonstrated the possible involvement of tau species in the progression of cognitive symptoms in PD. Another study suggests that CSF  $\alpha$ -synuclein levels correlate with PD-CD [35]. In addition to clinical data, several imaging techniques have been used to investigate changes in brain structure and function that may be predictive of future PD-CD. Dopamine active transporter (DAT), located in the presynaptic terminal of the dopaminergic projection and responsible for dopamine reuptake, is a marker of dopamine innervation, and a DAT SPECT is commonly used to diagnose dopaminergic neuron loss in the striatum [36]. Biomarker studies have revealed that lower dopamine levels on DAT SPECT, are linked to PD-CD [5,16,22,37]. Caspell-Garcia et al. found that lower DAT availability in the putamen is a longitudinal biomarker predictor of developing cognitive problems [38]. Another study reported that cognitive impairment was linked to lower DAT density on SPECT, especially in the caudate [39].

Traditionally, researchers have relied on classical statistical models to predict PD-CD. However, machine learning approaches are gaining traction due to their ability to handle complex datasets and potentially improve prediction accuracy [40–42]. Machine learning leverages clinical and imaging data more effectively, particularly in predicting PD-CD [6,43–45]. Unlike classical models, these approaches achieve high performance without the need for extensive manual programming [46].

PD-CD is a common and disabling symptom of PD, although its prediction and diagnosis are challenging due to the heterogeneity and complexity of the disease [47]. In this study, we used machine learning with different types of data, such as DAT SPECT and clinical biomarkers, to predict PD-CD based on two cognitive scales. We aim to compare the prognostic accuracy of MoCA and MDS-UPDRS-I based on the year and features that we use. Our approach will provide more accurate and personalized predictions of PD-CD and will contribute to the development of better diagnostic and therapeutic strategies.

## Materials and methods

In the below sections, we investigate our diverse data selection/generation, image processing methods, machine learning, and analysis methods. As shown in Fig 1, we first encoded our imaging data and clinical biomarkers, and then we used combinations of clinical and deep radiomic features to predict whether a PD-CD happens 2, 3, 4, and 5 years after the initial diagnosis using the MoCA and MDS-UPDRS-I scales. Unlike previous studies, here we defined PD-CD as any slight decrease in the score of MoCA or MDS-UPDRS-I, thereby enhancing our model's sensitivity to even subtle cognitive deteriorations.

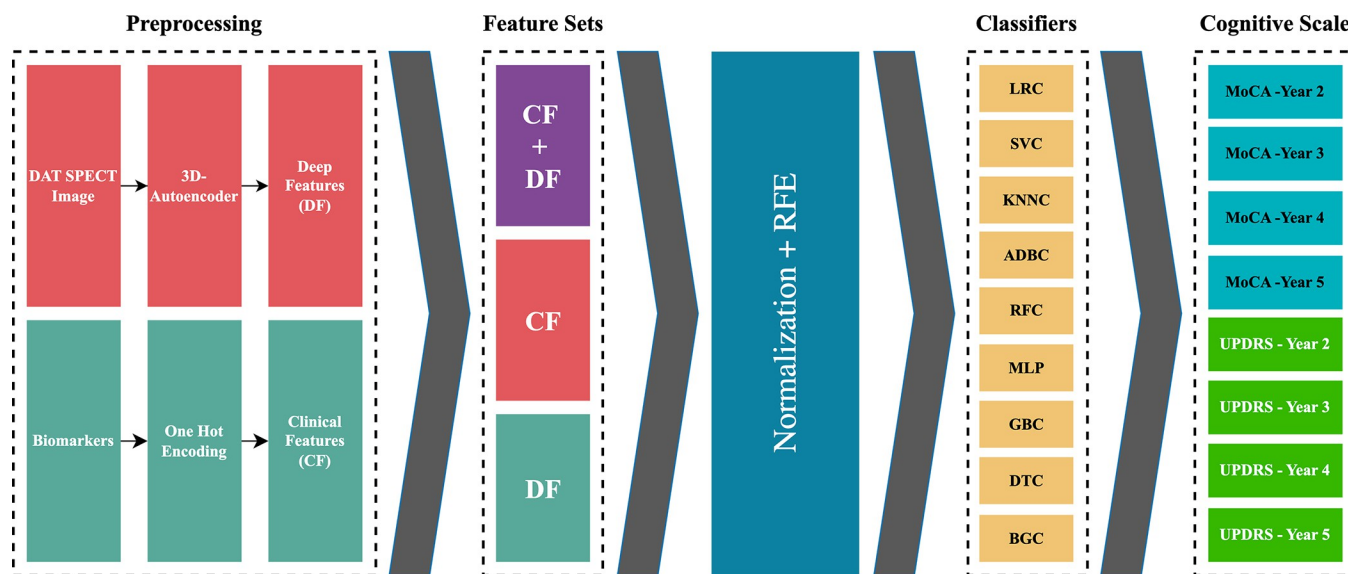

**Fig 1. Data collection procedure.** After extracting DFs, we combined CF and DF to make three different combinations of features. After feature set generation, we fed each feature set into nine different classifiers to predict PD-CD based on two cognitive scales and four timeframes. CF: Clinical feature, DF: Deep features, RFE: Recursive Feature Elimination, ADBC: AdaBoost Classifier, BGC: Bagging Classifier, SVC: Support Vector Classifier, KNN: K-Nearest Neighbors Classifier, RFC: Random Forest Classifier, GBC: Gradient Boosting Classifier, MLP: Multi-Layer Perceptron, DTC: Decision Tree Classifier, LRC: Logistic Regression Classifier, CF: Clinical Features, DF: Deep Features.

<https://doi.org/10.1371/journal.pone.0304355.g001>

## Participants

Data for this study were retrieved from the Parkinson's Progression Markers Initiative (PPMI) database, adhering to previously established inclusion and exclusion criteria for PPMI [48]. We further filtered participants based on our inclusion criteria: 1) Participants were required to exhibit all 17 clinical features at baseline assessment. 2) Participants needed to complete MDS-UPDRS-I and MoCA scores at baseline and follow-up visits at years 2, 3, 4, and 5. 3) All participants included in the study underwent DAT SPECT imaging at baseline. Based on these criteria, we included 330 patients and their DAT SPECT and clinical data in baseline; 204 and 126 patients, respectively, were male and female; the average age at baseline was  $61.2 \pm 9.6$  years.

## Clinical features

Different clinical variables and biomarkers are used to address cognitive impairment severity and prognosis. As previously discussed, recent studies showed that advanced age, genetic variation in APOE, gait disturbance, motor assessments, non-motor assessments, DAT imaging, electroencephalogram, and CSF biomarkers may contribute to the early prediction of PD-CI [5–7,10,24,37,38,44,49]. We used 17 of the most predictive clinical biomarkers in previous studies to further investigate the effect of clinical biomarkers alongside DAT SPECT. These biomarkers are age, CSF amyloid- $\beta$  42, CSF  $\alpha$ -Synuclein, hallucination, MDS-UPDRS-III, PIDG, CSF P-tau, CSF T-tau, serum uric acid, disease duration, The Scale for Outcomes in Parkinson's disease for Autonomic symptoms (SCOPA-AUT), Geriatric Depression Scale (GDS), APOE genetic variation, gender, Orthostatic hypotension, diabetes, and hypertension [50–52]. We then used one hot encoding to encode all of these biomarkers to clinical features (CF).

## Deep radiomic features

To investigate DAT SPECT images, we conducted a deep radiomic feature extraction from the DAT SPECT images that were extracted from PPMI. We first segmented the dorsal striatum

on DAT SPECT before feature extraction, using the same procedures as in our earlier study [16] (S1 File and S1 Fig). Following the segmentation process, we cropped the DAT SPECT images according to the segmentations and finally resized each image to its final size of 32 X 32 X 32. Intensity normalization was a further step we used before feature extraction. We also augmented images just by flipping them from left to right, as suggested in previous studies [53]. Subsequently, the images were inputted into the autoencoder for feature extraction. A detailed explanation of our proposed 3D-Autoencoder can be found in the S1 File. Using this 3D-Autoencoder, we extracted 1024 DFs from the bottleneck layer using DAT SPECT images. To further explore the predictive performance of clinical and deep features combined, we created a third feature set from a combination of the extracted data called CF + DF.

## Machine learning models

Based on previous studies [5–10], we used nine classifiers, AdaBoost Classifier (ADBC) [54], Support Vector Classifier (SVC) [55], K-Nearest Neighbors Classifier (KNNC) [56], Random Forest Classifier (RFC) [57], Gradient Boosting Classifier (GBC) [58], Bagging Classifier (BGC) [59], Multi-Layer Perceptron (MLP) [60], Decision Tree Classifier (DTC) [61], and Logistic Regression Classifier (LRC) [62] (Fig 1). They were chosen experimentally from different families of learning algorithms. Several studies have shown that using only some of the most relevant features improves performance on a variety of tasks compared to using all of them. It has been shown that most classifiers often cannot cope with large amounts of input to work [63,64]. Therefore, it is important to choose the optimal subset of features to use as input to avoid overfitting. We used Recursive Feature Elimination (RFE) [65] to select the top 10, 50, and 100 features from each feature set. In addition, we tuned the hyperparameters of the classifier using 5-fold cross-validation and grid search optimization techniques. Grid search optimization is a powerful way to significantly improve the performance of your ML methods. The data points are divided into 4 convolutions for training and 1 convolution for testing in 5-fold cross-validation. Moreover, 80% of the training data points were used for cross-validation and 20% were used for external tests.

## Results

We selected 330 patients from PPMI that had baseline, year 2, year 3, year 4, year 5 MoCA, and MDS-UPDRS-I scores. Before deploying machine learning algorithms, we performed a statistical examination with an unpaired t-test to assess differences between PD-CD individuals and non-converting PD (PD-NC) participants. This analysis considered a range of cognitive scales and time frames, with the findings presented in S2 and S3 Tables. Subsequently, this dataset was utilized to train our machine learning models to predict potential declines in MoCA and MDS-UPDRS-I scores over time. In total, 648 distinct trajectories were tested, encompassing 2 scales, 4 years, 3 feature sets, 3 feature sizes, and 9 algorithms. The performance of several algorithms and datasets is displayed in Fig 2. The best accuracy was selected between different combinations of feature set sizes for each trajectory.

The utilization of MoCA as a cognitive decline scale yielded better performance in various years compared to MDS-UPDRS-I. As shown in Fig 2 In year 4, the application of the DF resulted in the highest achievement, with a cross-validation AUC of 89.2, Utilizing the GBC with 100 features. The external test of 89.8 confirmed our finding. In year 3, the best outcome was attained by employing LRC and DFs, with a cross-validation AUC of 78.06 using 50 features, although the external test was 52. Similarly, in year 5, the combination of LRC and DF produced a cross-validation AUC of 77.93 using 50 features and an external test of 55.7. Conversely, year 2 demonstrated the lowest performance, with the most favorable outcome



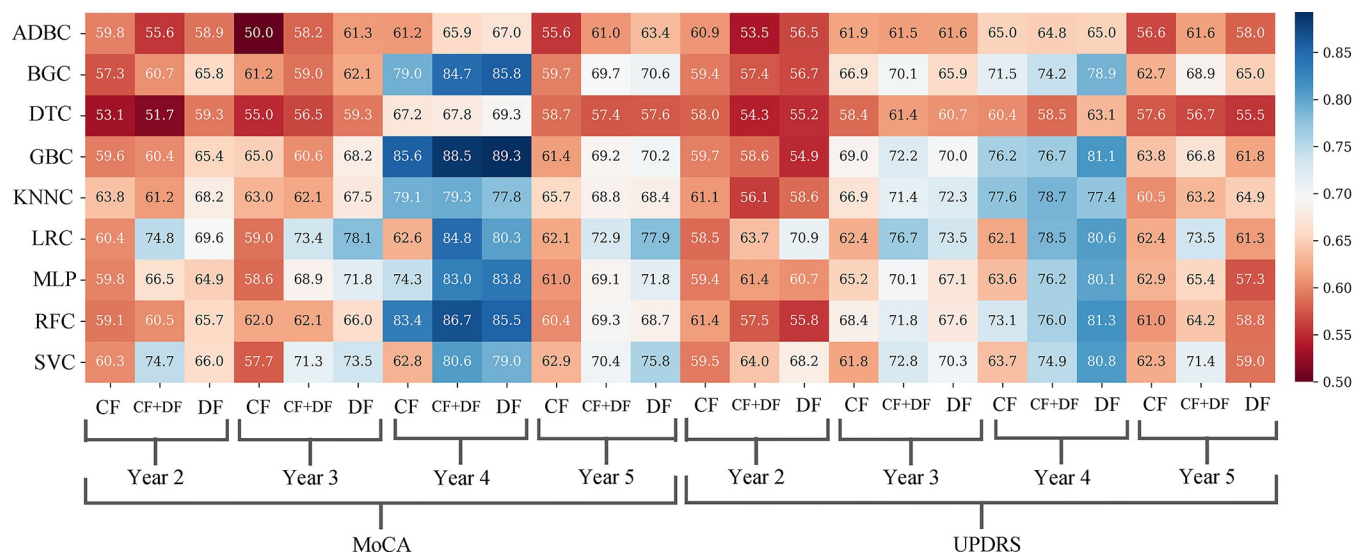

**Fig 2. Heatmap for cross-validation AUC scores.** Showing the superiority of MoCA performance compared to MDS-UPDRS-I and also the high performance of year 4 in both scales. ADBC: AdaBoost Classifier, BGC: Bagging Classifier, SVC: Support Vector Classifier, KNN: K-Nearest Neighbors Classifier, RFC: Random Forest Classifier, GBC: Gradient Boosting Classifier, MLP: Multi-Layer Perceptron, DTC: Decision Tree Classifier, LRC: Logistic Regression Classifier, CF: Clinical Features, DF: Deep Features.

<https://doi.org/10.1371/journal.pone.0304355.g002>

achieved by utilizing both CF + DF, in conjunction with LRC, resulting in a cross-validation AUC of 74.79 using 50 features and an external test of 46.6.

The optimal performance when using MDS-UPDRS-I as the cognitive decline scale varied across different years, and similar to MoCA, As shown in Fig 2, year 4 had the best performance with the highest achievement obtained by utilizing the DF, resulting in a cross-validation AUC of 81.34 with the RFC using 100 features and an external test of 78.6 confirmed our finding. For year 3, the best result was achieved through the use of LRC and DF, yielding a cross-validation AUC of 76.73 and an external test of 61.9 using 50 features. Similarly, in year 5, the combination of LR and DF + CF led to the best outcome, with a cross-validation AUC of 73.52 and an external test of 51.3. On the other hand, year 2 exhibited the lowest performance, with the most favorable result achieved by employing DF and LRC, resulting in a cross-validation AUC of 70.90 using 50 features with an external test of 43.5. External test results are shown in S3 Fig.

The MoCA and MDS-UPDRS-I scale ROC curves for the fourth year are displayed below in Fig 3. MoCA outperforms MDS-UPDRS-I in PD-CD prediction for all three feature sets.

## Discussion

The primary aim of this study was to evaluate the accuracy of the MOCA and MDS-UPDRS-I in predicting cognitive decline in PD over five years, utilizing ML techniques. Moreover, the study aimed to investigate the potential of different features, such as DAT SPECT imaging and clinical variables, to improve the accuracy and reliability of predicting PD-CD.

Cognitive impairment in PD can significantly affect the quality of life, functional independence, and treatment outcomes for both patients and their caregivers [66]. It is uncertain how cognitive decline in PD will ultimately manifest. Patients may either fully regain their cognitive abilities, remain in a state of mild cognitive impairment, or develop dementia [67]. Also, PD-CD is influenced by a variety of factors, including motor symptoms, non-motor symptoms, medical comorbidities, and psychosocial conditions, all of which interact in complex

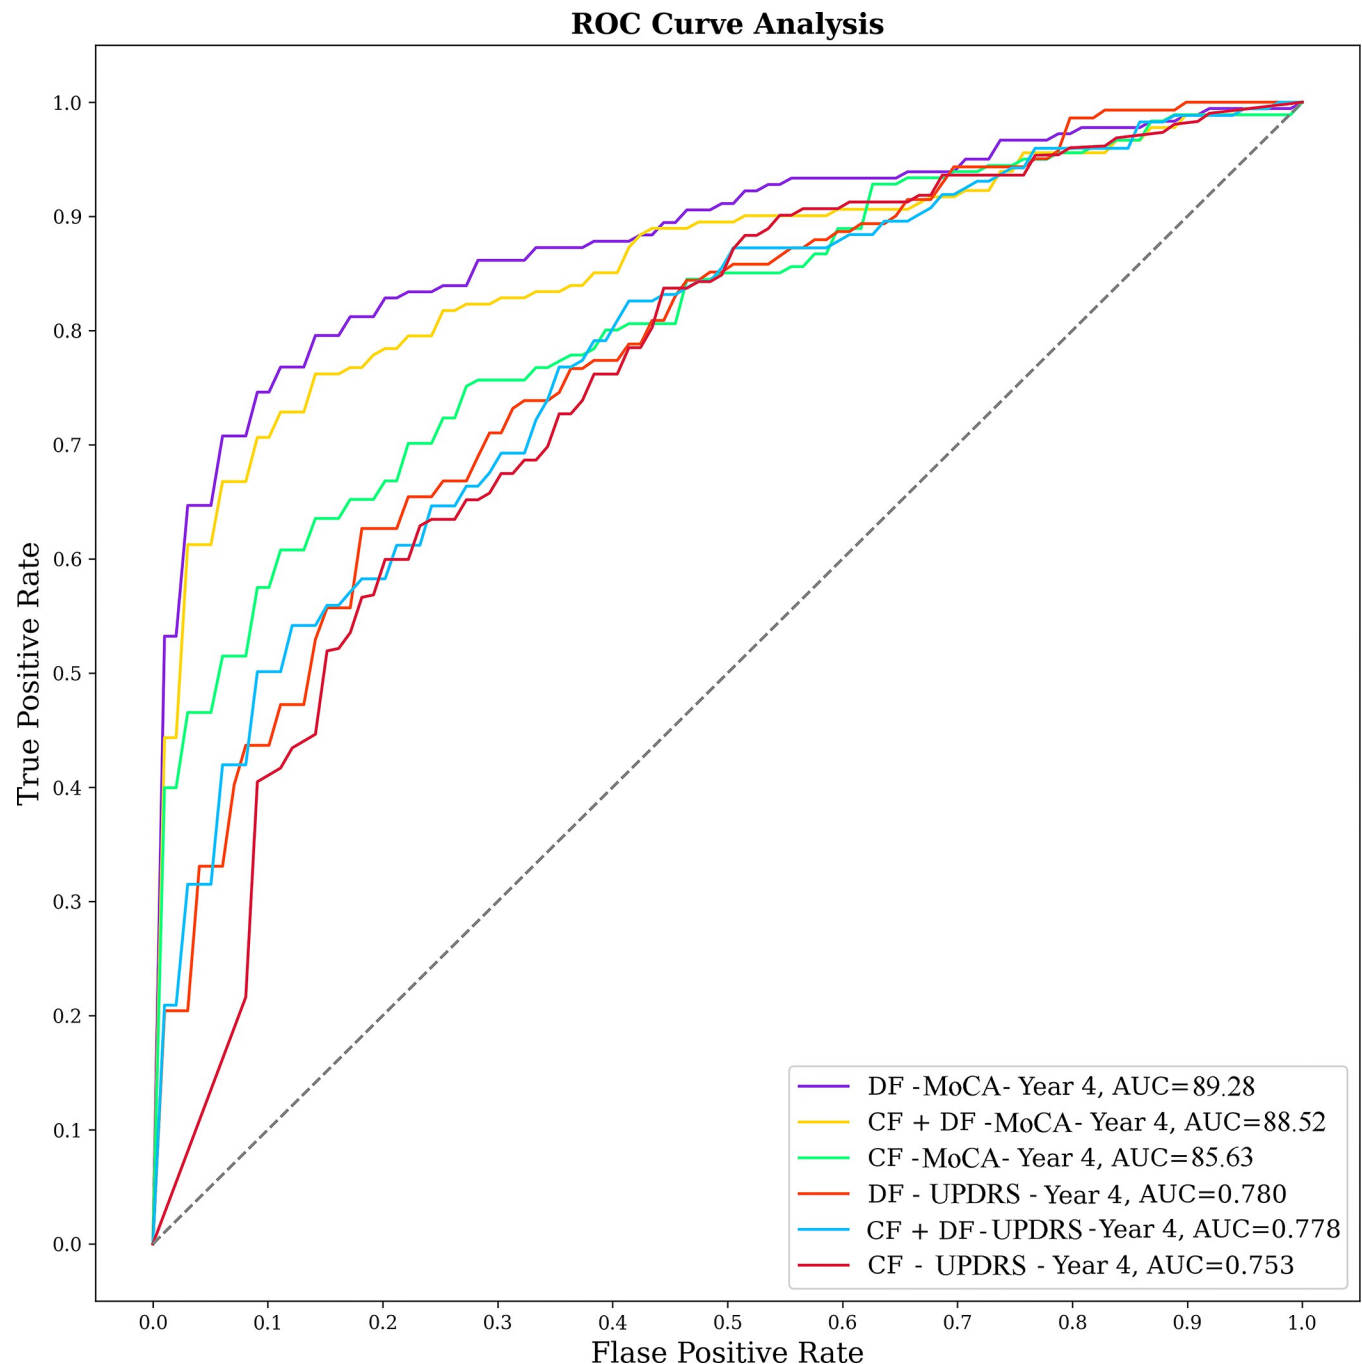

**Fig 3. Illustrates the ROC analysis.** Showcasing the superior results for both the MoCA and MDS-UPDRS-I across all three feature sets. The peak AUC performance for the MoCA was secured through the deployment of DF for forecasting the MoCA score in year 4. Similarly, the optimal AUC for the MDS-UPDRS-I was also obtained by employing DF to estimate the MDS-UPDRS-I score in the same year. CF: Clinical feature, DF: Deep features.

<https://doi.org/10.1371/journal.pone.0304355.g003>

ways [68]. The research conducted by Weil et al. emphasizes the importance of understanding mild cognitive impairment in PD and its progression to dementia [69]. This knowledge can pave the way for early interventions targeting cognitive decline in PD patients. Moreover, Ray et al. suggest that identifying patients at risk of cognitive decline early in the course of PD can aid in stratifying individuals for targeted interventions [70].

Cognitive assessment scales are essential for evaluating cognitive function in PD patients and detecting mild cognitive impairment and dementia, as well as cognitive decline for monitoring stages, which are common in PD. In our most recent research [16], we utilized HMLS for forecasting cognitive impairment in the fourth year, relying exclusively on the MoCA score as the cognitive measure without reference to alternative scales. In contrast, our current objective is to evaluate the MoCA against other cognitive scales present in PPMI, specifically MDS-UPDRS-I, and we found that using changes in MoCA score as a metric for cognitive decline can be more predictable compared to MDS-UPDRS-I. To our knowledge, this comparison was not done elsewhere before. One of the key distinctions between the MoCA and the MDS-UPDRS-I lies in their assessment focus. Although both measure NMS, the MoCA questionnaire evaluates a broader range of cognitive functions, while the MDS-UPDRS-I assesses symptoms related to cognition (S1 Table). Also, The Montreal Cognitive Assessment (MoCA) test is designed to be administered by a healthcare professional [17], But the MDS-UPDRS-I questionnaire is structured so that it can be filled out independently by the patient, collaboratively with caregiver input, or solely by the caregiver, based on the preference of the patient and caregiver [19].

Notably, the most significant results were observed in year four, suggesting that the onset of PD-CD becomes apparent and can be predicted with high accuracy at this stage. Previous studies indicated that PD-CD can become noticeable within 5 years of diagnosis [71]. This period is characterized by a decline in various cognitive domains, including executive function, attention, memory, and visuospatial abilities. Identifying these changes early on can aid in implementing appropriate interventions and support strategies to manage cognitive decline effectively.

DAT SPECT, which plays a significant role in tracking dopamine in the brain, could serve as a valuable tool for monitoring PD-CD. As shown in our study, the deep features extracted from DAT SPECT imaging offer a promising avenue for providing a comprehensive dataset that surpasses traditional clinical data in insight extraction. This sophisticated imaging technique serves as a quantitative biomarker for assessing the onset and progression of PD. Furthermore, the use of radiomic analysis on longitudinal DAT SPECT images has been shown to improve the prediction of PD outcomes, underscoring the diagnostic value of DAT SPECT imaging in this context [72].

One of the challenges we encountered in our study was the lack of longitudinal data from various cognitive questionnaires for temporal analysis. This shortfall in suitable longitudinal data necessitated the exclusion of two questionnaires namely Site Investigators Decision (SID) and MDS Task Force Guideline (MDS-TFG) neurophysiological battery. We also were not able to study the MDS-UPDRS-I cognitive impairment question individually as the PD-CD and PD-NC groups are extremely (1:5) imbalanced and even with implementing the Synthetic Minority Over-sampling Technique (SMOTE) our results were significantly overfitted.

As mentioned, we utilized DAT SPECT scan images due to their relevance to the dopamine-based mechanisms of PD. However, other imaging modalities may yield better results, and further studies are needed to compare the efficacy of different modalities. Looking ahead, exploring additional biomarkers and conducting longitudinal analyses of other medical recordings through machine learning techniques could greatly advance the development of AI models that are closely aligned with clinical applications; for example, the use of mobile and tablet-based applications for the ongoing longitudinal monitoring of patient's cognitive functions, coupled with the integration of these data into artificial intelligence tools, holds substantial promise for the field [73]. This allows us to have access to more data and train more robust models.



## Conclusions

The study findings indicate that the decline in MoCA as a measure for PD-CD results in higher performance within 5 years compared to MDS-UPDRS-I especially in year 4. Furthermore, deep radiomic features had better performance compared to sole clinical biomarkers or clinical and deep radiomic combined. These results suggest that using the MoCA score and Deep Radiomic features extracted from DAT SPECT could be a promising approach for identifying individuals at risk for cognitive decline in four years. Future research and additional data are needed to validate these findings and explore their utility in clinical practice.

## Supporting information

**S1 File. Imaging protocols.** Consist of three parts 1) S1 Appendix DAT SPECT image characteristics 2) S1 Protocol Image Preprocessing 3) S2 Protocol 3D-Autoencoder. (DOCX)

**S1 Fig. Preprocessing steps.** 1) Smooth images 2) Increase the contrast of the images 3) Use a threshold to digitize the image 4) Crop 3D ROI. (TIFF)

**S2 Fig. 3D autoencoder architecture.** It has four convolutional layers, each followed by a batch normalization and max-pooling operation. The pooling layers are used to reduce the number of parameters. The decoder path has four convolutional layers, each followed by batch normalization. (TIFF)

**S3 Fig. Heatmap for external test AUC based on different trajectories explained in the method section.** ADBC: AdaBoost Classifier, BGC: Bagging Classifier, SVC: Support Vector Classifier, KNN: K-Nearest Neighbors Classifier, RFC: Random Forest Classifier, GBC: Gradient Boosting Classifier, MLP: Multi-Layer Perceptron, DTC: Decision Tree Classifier, LRC: Logistic Regression Classifier, CF: Clinical Features, DF: Deep Features. (TIFF)

**S1 Table. Detail of MDS-UPDRS-I and MoCA questionnaires.** In the MDS-UPDRS-I, we utilized a summation of five sections that assess cognitive-related symptoms in Parkinson's Disease (PD). The total response to these items is scored on a scale of 0 to 20. Additionally, itemw from the MoCA is referenced in the accompanying table. The total response to these items is scored on a scale of 0 to 30. MDS-UPDRS-I: The Movement Disorder Society-Unified Parkinson's Disease Rating Scale, MoCA: Montreal Cognitive Assessment. (DOCX)

**S2 Table. Paired T-test outcomes for the MDS-UPDRS-I score.** In year 2, there was a significant gender-related discrepancy observed between the PD-CD and PD-NC groups. Year 3 highlighted a substantial difference in PIGD scores between the same groups. However, in years 4 and 5, the analysis revealed no significant differences between PD-CD and PD-NC. (DOCX)

**S3 Table. Results of the paired T-test for the MoCA score.** In year 2, a notable difference was observed in T-tau levels between the PD-CD and PD-NC groups. Year 3 saw a significant disparity in gender distribution between the two groups. No substantial differences were detected in year 4. However, in year 5, significant variations were found in a-synuclein, P-tau, T-tau, and diabetes occurrences between the PD-CD and PD-NC groups. (DOCX)

## Author Contributions

**Conceptualization:** Arman Gorji, Ali Fathi Jouzdani.

**Investigation:** Arman Gorji, Ali Fathi Jouzdani.

**Methodology:** Ali Fathi Jouzdani.

**Software:** Arman Gorji, Ali Fathi Jouzdani.

**Supervision:** Ali Fathi Jouzdani.

**Visualization:** Arman Gorji, Ali Fathi Jouzdani.

**Writing – original draft:** Arman Gorji, Ali Fathi Jouzdani.

**Writing – review & editing:** Ali Fathi Jouzdani.

## References

1. Bloem BR, Okun MS, Klein C. Parkinson's disease. *Lancet Lond Engl*. 2021; 397: 2284–2303. [https://doi.org/10.1016/S0140-6736\(21\)00218-X](https://doi.org/10.1016/S0140-6736(21)00218-X) PMID: 33848468
2. Shulman JM, De Jager PL, Feany MB. Parkinson's disease: genetics and pathogenesis. *Annu Rev Pathol*. 2011; 6: 193–222. <https://doi.org/10.1146/annurev-pathol-011110-130242> PMID: 21034221
3. Aarsland D, Batzu L, Halliday GM, Geurtsen GJ, Ballard C, Ray Chaudhuri K, et al. Parkinson disease-associated cognitive impairment. *Nat Rev Dis Primer*. 2021; 7: 1–21. <https://doi.org/10.1038/s41572-021-00280-3> PMID: 34210995
4. Aarsland D, Creese B, Politis M, Chaudhuri KR, Weintraub D, Ballard C, et al. Cognitive decline in Parkinson disease. *Nat Rev Neurol*. 2017; 13: 217–231. <https://doi.org/10.1038/nrneurol.2017.27> PMID: 28257128
5. Salmanpour MR, Shamsaei M, Saberi A, Setayeshi S, Klyuzhin IS, Sossi V, et al. Optimized machine learning methods for prediction of cognitive outcome in Parkinson's disease. *Comput Biol Med*. 2019; 111: 103347. <https://doi.org/10.1016/j.combiomed.2019.103347> PMID: 31284154
6. Harvey J, Reijnders RA, Cavill R, Duits A, Köhler S, Eijssen L, et al. Machine learning-based prediction of cognitive outcomes in de novo Parkinson's disease. *medRxiv*; 2022. p. 2022.02.02. <https://doi.org/10.1038/s41531-022-00409-5> PMID: 36344548.
7. Booth S, Park KW, Lee CS, Ko JH. Predicting cognitive decline in Parkinson's disease using FDG-PET-based supervised learning. *J Clin Invest*. 2022; 132: e157074. <https://doi.org/10.1172/JCI157074> PMID: 36040832
8. Gramotnev G, Gramotnev DK, Gramotnev A. Parkinson's disease prognostic scores for progression of cognitive decline. *Sci Rep*. 2019; 9: 17485. <https://doi.org/10.1038/s41598-019-54029-w> PMID: 31767922
9. Hayete B, Wuest D, Laramie J, McDonagh P, Church B, Eberly S, et al. A Bayesian mathematical model of motor and cognitive outcomes in Parkinson's disease. *PLoS One*. 2017; 12: e0178982. <https://doi.org/10.1371/journal.pone.0178982> PMID: 28604798
10. Byeon H. Development of a Predictive Model for Mild Cognitive Impairment in Parkinson's Disease with Normal Cognition Using Kernel-Based C5.0 Machine Learning Blending: Preliminary Research. *Eng Proc*. 2021; 11: 18. <https://doi.org/10.3390/ASEC2021-11147>
11. Hobson P, Meara J. Mild cognitive impairment in Parkinson's disease and its progression onto dementia: a 16-year outcome evaluation of the Denbighshire cohort. *Int J Geriatr Psychiatry*. 2015; 30: 1048–1055. <https://doi.org/10.1002/gps.4261> PMID: 25676160
12. Pigott K, Rick J, Xie SX, Hurtig H, Chen-Plotkin A, Duda JE, et al. Longitudinal study of normal cognition in Parkinson disease. *Neurology*. 2015; 85: 1276–1282. <https://doi.org/10.1212/WNL.0000000000002001> PMID: 26362285
13. Wood K-L, Myall DJ, Livingston L, Melzer TR, Pitcher TL, MacAskill MR, et al. Different PD-MCI criteria and risk of dementia in Parkinson's disease: 4-year longitudinal study. *NPJ Park Dis*. 2016; 2: 15027. <https://doi.org/10.1038/npjparkd.2015.27> PMID: 28725690
14. Kim HM, Nator C, Zabetian CP, Quinn JF, Chung KA, Hiller AL, et al. Prediction of cognitive progression in Parkinson's disease using three cognitive screening measures. *Clin Park Relat Disord*. 2019; 1: 91–97. <https://doi.org/10.1016/j.prdoa.2019.08.006> PMID: 32368733

15. Almgren H, Camacho M, Hanganu A, Kibreab M, Camicioli R, Ismail Z, et al. Machine learning-based prediction of longitudinal cognitive decline in early Parkinson's disease using multimodal features. *Sci Rep*. 2023; 13: 13193. <https://doi.org/10.1038/s41598-023-37644-6> PMID: 37580407
16. Hosseinzadeh M, Gorji A, Fathi Jouzdani A, Rezaei SM, Rahmim A, Salmanpour MR. Prediction of Cognitive Decline in Parkinson's Disease Using Clinical and DAT SPECT Imaging Features, and Hybrid Machine Learning Systems. *Diagnostics*. 2023; 13: 1691. <https://doi.org/10.3390/diagnostics13101691> PMID: 37238175
17. Nasreddine ZS, Phillips NA, Bédirian V, Charbonneau S, Whitehead V, Collin I, et al. The Montreal Cognitive Assessment, MoCA: a brief screening tool for mild cognitive impairment. *J Am Geriatr Soc*. 2005; 53: 695–699. <https://doi.org/10.1111/j.1532-5415.2005.53221.x> PMID: 15817019
18. Martínez-Martín P, Gil-Nagel A, Gracia LM, Gómez JB, Martínez-Sarriés J, Bermejo F. Unified Parkinson's Disease Rating Scale characteristics and structure. The Cooperative Multicentric Group. *Mov Disord Off J Mov Disord Soc*. 1994; 9: 76–83. <https://doi.org/10.1002/mds.870090112> PMID: 8139608
19. Goetz CG, Tilley BC, Shaftman SR, Stebbins GT, Fahn S, Martinez-Martin P, et al. Movement Disorder Society-sponsored revision of the Unified Parkinson's Disease Rating Scale (MDS-UPDRS): Scale presentation and clinimetric testing results. *Mov Disord*. 2008; 23: 2129–2170. <https://doi.org/10.1002/mds.22340> PMID: 19025984
20. Zarkali A, Luppi AI, Stamatakis EA, Reeves S, McColgan P, Leyland L-A, et al. Changes in dynamic transitions between integrated and segregated states underlie visual hallucinations in Parkinson's disease. *Commun Biol*. 2022; 5: 1–15. <https://doi.org/10.1038/s42003-022-03903-x> PMID: 36075964
21. Jones JD, Mangal P, Lafo J, Okun MS, Bowers D. Mood Differences among Parkinson's Disease Patients with Mild Cognitive Impairment. *J Neuropsychiatry Clin Neurosci*. 2016; 28: 211–216. <https://doi.org/10.1176/appi.neuropsych.15090221> PMID: 26792098
22. Schrag A, Siddiqui UF, Anastasiou Z, Weintraub D, Schott JM. Clinical variables and biomarkers in prediction of cognitive impairment in patients with newly diagnosed Parkinson's disease: a cohort study. *Lancet Neurol*. 2017; 16: 66–75. [https://doi.org/10.1016/S1474-4422\(16\)30328-3](https://doi.org/10.1016/S1474-4422(16)30328-3) PMID: 27866858
23. Stuart S, Lawson RA, Yarnall AJ, Nell J, Alcock L, Duncan GW, et al. Pro-Saccades Predict Cognitive Decline in Parkinson's Disease: ICICLE-PD. *Mov Disord*. 2019; 34: 1690–1698. <https://doi.org/10.1002/mds.27813> PMID: 31442355
24. Guo Y, Liu F-T, Hou X-H, Li J-Q, Cao X-P, Tan L, et al. Predictors of cognitive impairment in Parkinson's disease: a systematic review and meta-analysis of prospective cohort studies. *J Neurol*. 2021; 268: 2713–2722. <https://doi.org/10.1007/s00415-020-09757-9> PMID: 32162063
25. Liu X, Dong T, Zhang Y, Zhao Y, Yang J, Gu C, et al. Relationship between serum homocysteine level and cognitive impairment in patients with Parkinson's disease. *Pteridines*. 2019; 30: 177–182. <https://doi.org/10.1515/pteridines-2019-0023>
26. Kandiah N, Zhang A, Cenina AR, Au WL, Nadkarni N, Tan LC. Montreal Cognitive Assessment for the screening and prediction of cognitive decline in early Parkinson's disease. *Parkinsonism Relat Disord*. 2014; 20: 1145–1148. <https://doi.org/10.1016/j.parkreldis.2014.08.002> PMID: 25176439
27. Bejr-kasem H, Sampedro F, Marín-Lahoz J, Martínez-Horta S, Pagonabarraga J, Kulisevsky J. Minor hallucinations reflect early gray matter loss and predict subjective cognitive decline in Parkinson's disease. *Eur J Neurol*. 2021; 28: 438–447. <https://doi.org/10.1111/ene.14576> PMID: 33032389
28. Baba T, Kikuchi A, Hirayama K, Nishio Y, Hosokai Y, Kanno S, et al. Severe olfactory dysfunction is a prodromal symptom of dementia associated with Parkinson's disease: a 3-year longitudinal study. *Brain*. 2012; 135: 161–169. <https://doi.org/10.1093/brain/awr321> PMID: 22287381
29. Fang T-C, Chang M-H, Yang C-P, Chen Y-H, Lin C-H. The Association of Olfactory Dysfunction with Depression, Cognition, and Disease Severity in Parkinson's Disease. *Front Neurol*. 2021; 12. <https://doi.org/10.3389/fneur.2021.779712> PMID: 34880827
30. Solla P, Masala C, Ercoli T, Frau C, Bagella C, Pinna I, et al. Olfactory Impairment Correlates with Executive Functions Disorders and Other Specific Cognitive Dysfunctions in Parkinson's Disease. *Biology*. 2023; 12: 112. <https://doi.org/10.3390/biology12010112> PMID: 36671804
31. Cecchini MP, Federico A, Zanini A, Mantovani E, Masala C, Tinazzi M, et al. Olfaction and taste in Parkinson's disease: the association with mild cognitive impairment and the single cognitive domain dysfunction. *J Neural Transm*. 2019; 126: 585–595. <https://doi.org/10.1007/s00702-019-01996-z> PMID: 30911822
32. Szwedo AA, Dalen I, Pedersen KF, Camacho M, Bäckström D, Forsgren L, et al. GBA and APOE Impact Cognitive Decline in Parkinson's Disease: A 10-Year Population-Based Study. *Mov Disord Off J Mov Disord Soc*. 2022; 37: 1016–1027. <https://doi.org/10.1002/mds.28932> PMID: 35106798
33. Jo S, Kim S-O, Park KW, Lee SH, Hwang YS, Chung SJ. The role of APOE in cognitive trajectories and motor decline in Parkinson's disease. *Sci Rep*. 2021; 11: 7819. <https://doi.org/10.1038/s41598-021-86483-w> PMID: 33837234

34. Liu C, Cholerton B, Shi M, Ghingina C, Cain KC, Auinger P, et al. CSF tau and tau/A $\beta$ 42 predict cognitive decline in Parkinson's disease. *Parkinsonism Relat Disord*. 2015; 21: 271–276. <https://doi.org/10.1016/j.parkreldis.2014.12.027> PMID: 25596881
35. Lin C-H, Yang S-Y, Horng H-E, Yang C-C, Chieh J-J, Chen H-H, et al. Plasma  $\alpha$ -synuclein predicts cognitive decline in Parkinson's disease. *J Neurol Neurosurg Psychiatry*. 2017; 88: 818–824. <https://doi.org/10.1136/jnnp-2016-314857> PMID: 28550072
36. AKDEMİR ÜÖBORA TOKÇAER, ATAY LÖ1. Dopamine transporter SPECT imaging in Parkinson's disease and parkinsonian disorders. *Turk J Med Sci*. 2021; 51: 400–410. <https://doi.org/10.3906/sag-2008-253> PMID: 33237660
37. Liu G, Locascio JJ, Corvol J-C, Boot B, Liao Z, Page K, et al. Prediction of cognition in Parkinson's disease with a clinical–genetic score: a longitudinal analysis of nine cohorts. *Lancet Neurol*. 2017; 16: 620–629. [https://doi.org/10.1016/S1474-4422\(17\)30122-9](https://doi.org/10.1016/S1474-4422(17)30122-9) PMID: 28629879
38. Caspell-Garcia C, Simuni T, Tosun-Turgut D, Wu I-W, Zhang Y, Nalls M, et al. Multiple modality biomarker prediction of cognitive impairment in prospectively followed de novo Parkinson disease. *PLOS ONE*. 2017; 12: e0175674. <https://doi.org/10.1371/journal.pone.0175674> PMID: 28520803
39. Andersson S, Josefsson M, Stiernman LJ, Rieckmann A. Cognitive Decline in Parkinson's Disease: A Subgroup of Extreme Decliners Revealed by a Data-Driven Analysis of Longitudinal Progression. *Front Psychol*. 2021; 12: 729755. <https://doi.org/10.3389/fpsyg.2021.729755> PMID: 34566817
40. Salmanpour MR, Hosseinzadeh M, Sanati N, Jouzdani AF, Gorji A, Mahboubisariaghieh A, et al. Tensor Deep versus Radiomics Features: Lung Cancer Outcome Prediction using Hybrid Machine Learning Systems. *Soc Nuclear Med*; 2023. Available: [https://jnm.snmjournals.org/content/64/supplement\\_1/P1174.abstract](https://jnm.snmjournals.org/content/64/supplement_1/P1174.abstract).
41. Gorji A, Jouzdani AF, Sanati N, Hosseinzadeh M, Mahboubisariaghieh A, Rezaei SM, et al. PET-CT Fusion Based Outcome Prediction in Lung Cancer using Deep and Handcrafted Radiomics Features and Machine Learning. *Soc Nuclear Med*; 2023. Available: [https://jnm.snmjournals.org/content/64/supplement\\_1/P1196.abstract](https://jnm.snmjournals.org/content/64/supplement_1/P1196.abstract).
42. Gorji A, Hosseinzadeh M, Jouzdani AF, Sanati N, Rizi FY, Moore S, et al. Region-of-Interest and Handcrafted vs. Deep Radiomics Feature Comparisons for Survival Outcome Prediction: Application to Lung PET/CT Imaging. 2023 IEEE Nuclear Science Symposium, Medical Imaging Conference and International Symposium on Room-Temperature Semiconductor Detectors (NSS MIC RTSD). IEEE; 2023. pp. 1–2. <https://doi.org/10.1109/NSSMICRTSD49126.2023.10338394>
43. Klyuzhin I, Shenkov N, Rahmim A, Sossi V. Use of deep convolutional neural networks to predict Parkinson's disease progression from DaTscan SPECT images. *J Nucl Med*. 2018; 59: 29–29.
44. Shin N-Y, Bang M, Yoo S-W, Kim J-S, Yun E, Yoon U, et al. Cortical Thickness from MRI to Predict Conversion from Mild Cognitive Impairment to Dementia in Parkinson Disease: A Machine Learning-based Model. *Radiology*. 2021; 300: 390–399. <https://doi.org/10.1148/radiol.2021203383> PMID: 34032515
45. Jouzdani AF, Gorji A, Hosseinzadeh M, Rahmim A, Salmanpour MR. Prediction of Cognitive Decline in Parkinson's Disease using Deep and Handcrafted Radiomics Features. *EUROPEAN JOURNAL OF NUCLEAR MEDICINE AND MOLECULAR IMAGING*. SPRINGER ONE NEW YORK PLAZA, SUITE 4600, NEW YORK, NY, UNITED STATES; 2022. pp. S195–S196.
46. Koza JR, Bennett FH, Andre D, Keane MA. Automated Design of Both the Topology and Sizing of Analog Electrical Circuits Using Genetic Programming. In: Gero JS, Sudweeks F, editors. *Artificial Intelligence in Design '96*. Dordrecht: Springer Netherlands; 1996. pp. 151–170. [https://doi.org/10.1007/978-94-009-0279-4\\_9](https://doi.org/10.1007/978-94-009-0279-4_9)
47. Biundo R, Weis L, Antonini A. Cognitive decline in Parkinson's disease: the complex picture. *NPJ Park Dis*. 2016; 2: 16018. <https://doi.org/10.1038/npjparkd.2016.18> PMID: 28725699
48. Marek K, Chowdhury S, Siderowf A, Lasch S, Coffey CS, Caspell-Garcia C, et al. The Parkinson's progression markers initiative (PPMI)—establishing a PD biomarker cohort. *Ann Clin Transl Neurol*. 2018; 5: 1460–1477. <https://doi.org/10.1002/acn3.644> PMID: 30564614
49. Arnaldi D, Campus C, Ferrara M, Famà F, Picco A, De Carli F, et al. What predicts cognitive decline in de novo Parkinson's disease? *Neurobiol Aging*. 2012; 33: 1127.e11–1127.e20. <https://doi.org/10.1016/j.neurobiolaging.2011.11.028> PMID: 22226489
50. Delgado-Alvarado M, Gago B, Navalpotro-Gomez I, Jiménez-Urbietta H, Rodríguez-Oroz MC. Biomarkers for dementia and mild cognitive impairment in Parkinson's disease: Biomarkers and Cognition in Parkinson's Disease. *Mov Disord*. 2016; 31: 861–881. <https://doi.org/10.1016/j.jnmd.2016.08.001>
51. Lin C-H, Wu R-M. Biomarkers of cognitive decline in Parkinson's disease. *Parkinsonism Relat Disord*. 2015; 21: 431–443. <https://doi.org/10.1016/j.parkreldis.2015.02.010> PMID: 25737398
52. Mollenhauer B, Rochester L, Chen-Plotkin A, Brooks D. What can biomarkers tell us about cognition in Parkinson's disease? Biomarkers for Cognitive Decline in PD. *Mov Disord*. 2014; 29: 622–633. <https://doi.org/10.1016/j.jnmd.2014.05.001>

53. Adams MP, Tang J, Arman, Rahmim. Improved motor outcome prediction in Parkinson's disease applying deep learning to DaTscan SPECT images. *Comput Biol Med.* 2021; 132: 104312. <https://doi.org/10.1016/j.combiomed.2021.104312> PMID: 33892414
54. Freund Y, Schapire RE. A Decision-Theoretic Generalization of On-Line Learning and an Application to Boosting. *J Comput Syst Sci.* 1997; 55: 119–139. <https://doi.org/10.1006/jcss.1997.1504>
55. Cortes C, Vapnik V. Support-vector networks. *Mach Learn.* 1995; 20: 273–297. <https://doi.org/10.1007/BF00994018>
56. Fix E, Hodges JL. Discriminatory analysis. Nonparametric discrimination: Consistency properties. *Int Stat Rev Int Stat.* 1989; 57: 238–247.
57. Uddin S, Khan A, Hossain ME, Moni MA. Comparing different supervised machine learning algorithms for disease prediction. *BMC Med Inform Decis Mak.* 2019; 19: 281. <https://doi.org/10.1186/s12911-019-1004-8> PMID: 31864346
58. [1908.06951] Gradient Boosting Machine: A Survey. [cited 19 Apr 2024]. Available: <https://arxiv.org/abs/1908.06951>.
59. Skurichina M, Duin RPW. Bagging, Boosting and the Random Subspace Method for Linear Classifiers. *Pattern Anal Appl.* 2002; 5: 121–135. <https://doi.org/10.1007/s100440200011>
60. Gardner MW, Dorling SR. Artificial neural networks (the multilayer perceptron)—a review of applications in the atmospheric sciences. *Atmos Environ.* 1998; 32: 2627–2636. [https://doi.org/10.1016/S1352-2310\(97\)00447-0](https://doi.org/10.1016/S1352-2310(97)00447-0)
61. SONG YLU Y. Decision tree methods: applications for classification and prediction. *Shanghai Arch Psychiatry.* 2015; 27: 130–135. <https://doi.org/10.11919/j.issn.1002-0829.215044> PMID: 26120265
62. Schmidt M, Roux NL, Bach F. Minimizing Finite Sums with the Stochastic Average Gradient. *arXiv*; 2016. <https://doi.org/10.48550/arXiv.1309.2388>
63. Salmanpour MR, Hosseinzadeh M, Bakhtiari M, Ghaemi MM, Rezaei SM, Nabizadeh AH, et al. Cognitive Outcome Prediction in Parkinson's Disease using Hybrid Machine Learning Systems and Radiomics Features. *Soc Nuclear Med*; 2022.
64. Salmanpour MR, Shamsaei M, Rahmim A. Feature selection and machine learning methods for optimal identification and prediction of subtypes in Parkinson's disease. *Comput Methods Programs Biomed.* 2021; 206: 106131. <https://doi.org/10.1016/j.cmpb.2021.106131> PMID: 34015757
65. Feature Selection Using Recursive Feature Elimination for Handwritten Digit Recognition | IEEE Conference Publication | IEEE Xplore. [cited 19 Apr 2024]. Available: <https://ieeexplore.ieee.org/document/5337549>.
66. Mack J, Marsh L. Parkinson's Disease: Cognitive Impairment. *Focus J Life Long Learn Psychiatry.* 2017; 15: 42–54. <https://doi.org/10.1176/appi.focus.20160043> PMID: 31975839
67. Weil RS, Costantini AA, Schrag AE. Mild Cognitive Impairment in Parkinson's Disease—What Is It? *Curr Neurol Neurosci Rep.* 2018; 18: 17. <https://doi.org/10.1007/s11910-018-0823-9> PMID: 29525906
68. Fang C, Lv L, Mao S, Dong H, Liu B. Cognition Deficits in Parkinson's Disease: Mechanisms and Treatment. *Park Dis.* 2020; 2020: 2076942. <https://doi.org/10.1155/2020/2076942> PMID: 32269747
69. Postuma RB, Berg D, Stern M, Poewe W, Olanow CW, Oertel W, et al. MDS clinical diagnostic criteria for Parkinson's disease. *Mov Disord Off J Mov Disord Soc.* 2015; 30: 1591–1601. <https://doi.org/10.1002/mds.26424> PMID: 26474316
70. Ray NJ, Bradburn S, Murgatroyd C, Toseeb U, Mir P, Kountouriotis GK, et al. In vivo cholinergic basal forebrain atrophy predicts cognitive decline in de novo Parkinson's disease. *Brain J Neurol.* 2018; 141: 165–176. <https://doi.org/10.1093/brain/awx310> PMID: 29228203
71. Jones JD, Baxter F, Timblin H, Rivas R, Hill CR. Physical inactivity is associated with Parkinson's disease mild cognitive impairment and dementia. *Ment Health Phys Act.* 2022; 23: 100461. <https://doi.org/10.1016/j.mhpa.2022.100461>
72. Rahmim A, Huang P, Shenkov N, Fotouhi S, Davoodi-Bojd E, Lu L, et al. Improved prediction of outcome in Parkinson's disease using radiomics analysis of longitudinal DAT SPECT images. *NeuroImage Clin.* 2017; 16: 539–544. <https://doi.org/10.1016/j.nicl.2017.08.021> PMID: 29868437
73. Gorji A, Fathi Jouzdani A. PerPsych: An iPadOS-based open-source neuropsychological software for time perception assessment. *MethodsX.* 2024; 12: 102504. <https://doi.org/10.1016/j.mex.2023.102504> PMID: 38179067
